# Supplementary material for: A critical role for ChREBP-mediated FGF21 secretion in hepatic fructose metabolism
Source: PubMed Central journal article supplement — Mol Metab. 2016 Nov 23;6(1):14–21. doi: 10.1016/j.molmet.2016.11.008 (PMC5220398; doi:10.1016/j.molmet.2016.11.008), 2016-11-23
Supplement: mmc1.pdf [file mmc1.pdf]

**A**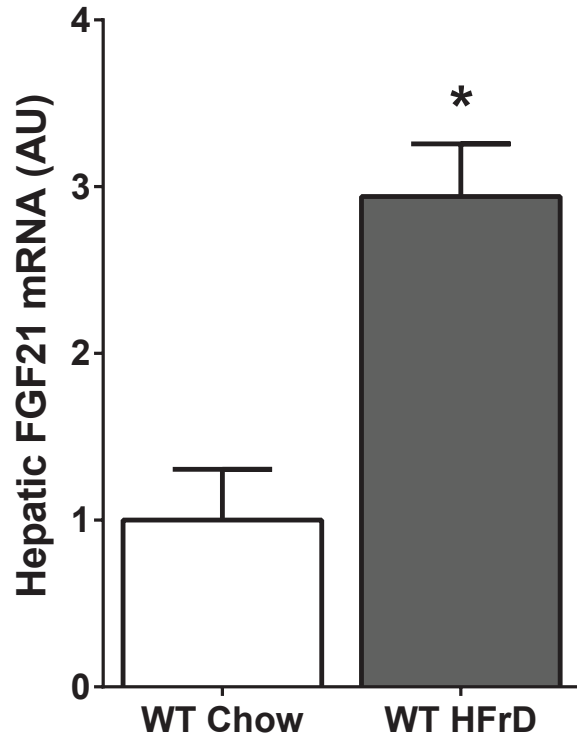**B**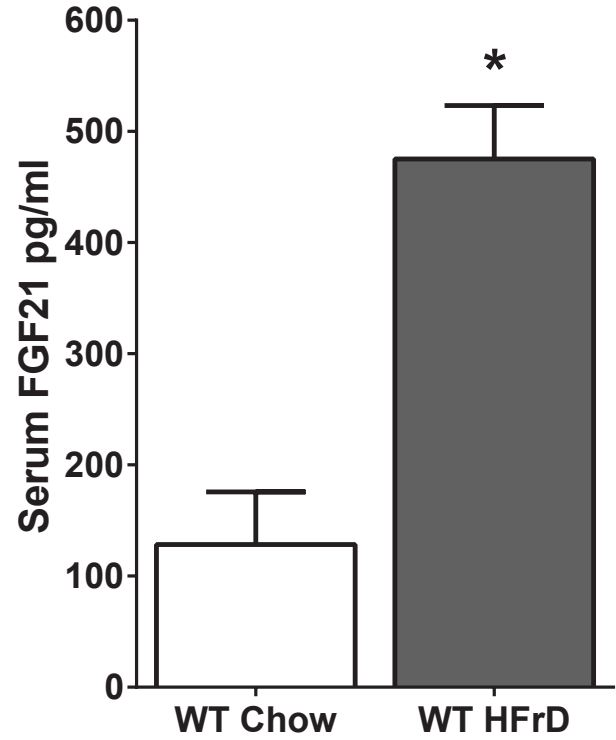

Supplemental Figure 1. FGF21 levels in wild type mice fed adlib fed a HFrD for 4 weeks. A) Hepatic FGF21 mRNA expression and B) circulating FGF21 levels are concomitantly increased. \* $P < 0.05$ , Chow vs Fructose.  $n = 5-7$  per group.

## Supplemental Figure 2

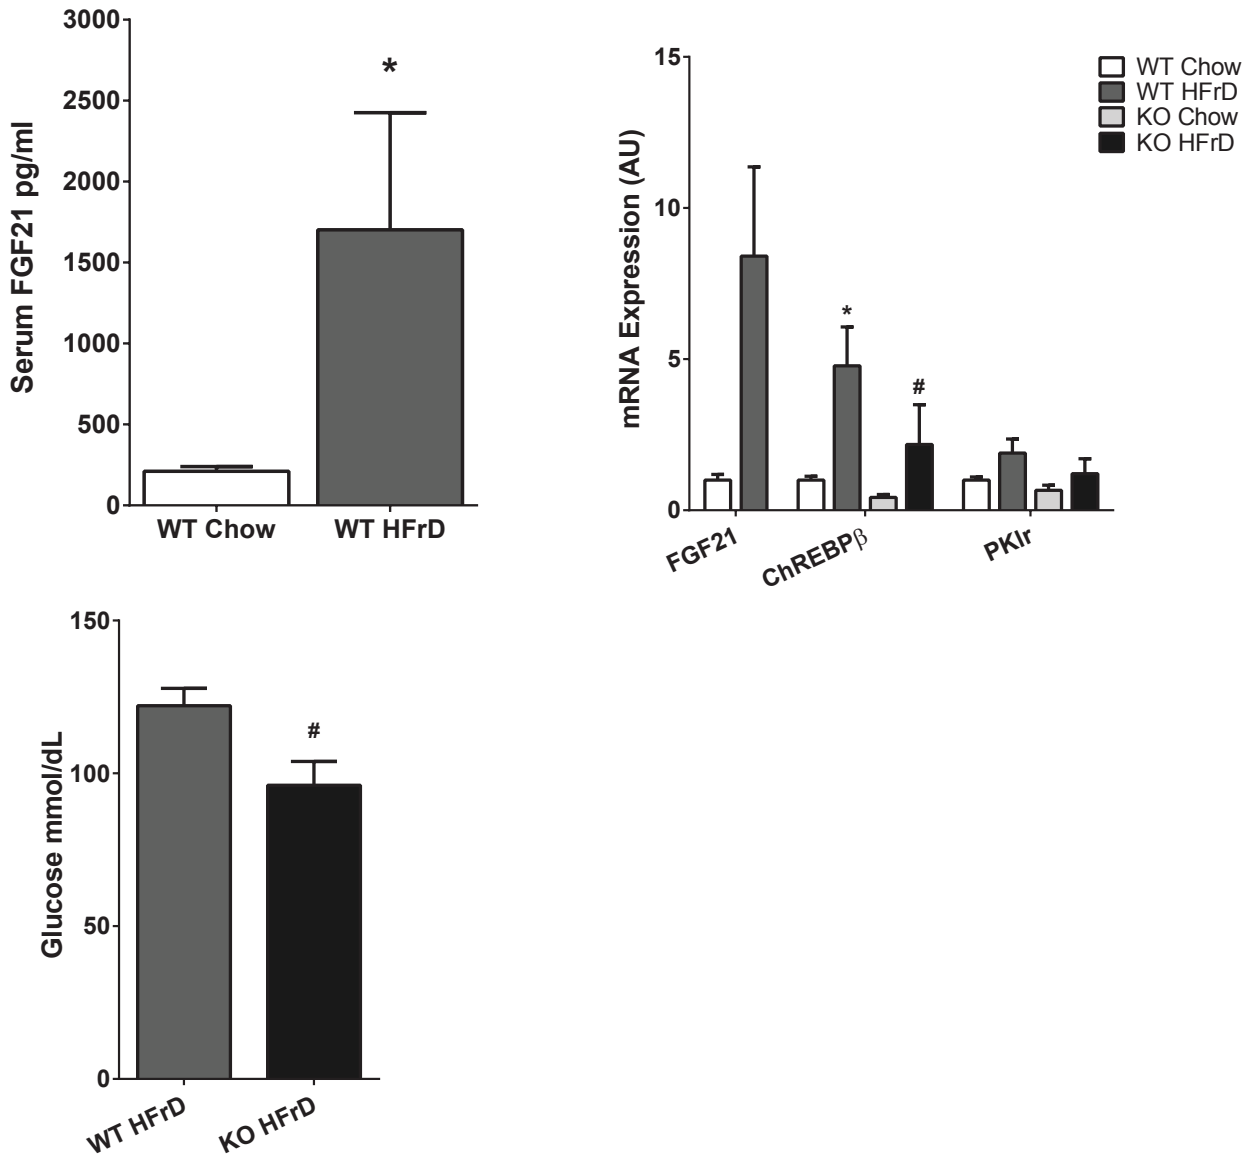

Supplemental Figure 2. Acute response to HFrD in WT and FGF21 KO mice. Chow fed mice were fasted overnight and re-fed HFrD for 4 hours. A) Serum FGF21 levels were significantly elevated during this prandial phase. B) The induction of *ChREBP- $\beta$*  was significantly attenuated in FGF21 KO mice. C) Fed serum glucose levels were significantly lower in FGF21 KO mice consuming HFrD. \* $P < 0.05$ , Chow vs Fructose for each genotype. # $P < 0.05$ , Fructose WT vs Fructose KO.  $n = 6$  per group.

| <b>Human Subjects Data</b>           |             |
|--------------------------------------|-------------|
| Subjects (M/F)                       | 14 (9/5)    |
| Age (Years)                          | 36 ± 12     |
| Waist circumference (cm)             | 89 ± 8      |
| Body mass index (kg/m <sup>2</sup> ) | 25.8 ± 3.1  |
| Total cholesterol (mg/dL)            | 158 ± 17    |
| LDL-C (mg/dL)                        | 90 ± 22     |
| HDL-C (mg/dL)                        | 48 ± 17     |
| Triglycerides (mg/dL)                | 114 ± 100   |
| Apolipoprotein B (mg/dL)             | 77 ± 10     |
| LDL size (nm)                        | 21.1 ± 0.8  |
| Fasting glucose (mg/dL)              | 86 ± 6      |
| 2 h OGTT glucose (mg/dL)             | 101 ± 26    |
| Insulin (U/mL)                       | 5.1 ± 5.5   |
| HbA1C (%)                            | 5.2 ± 0.4   |
| hs-CRP (mg/L)                        | 0.66 ± 0.06 |
| FGF21 (pg/mL)                        | 133 ± 104   |

Supplementary Table 1. Characteristics of human subjects. Values are shown as mean ± SD
